# Supplementary material for: Identifying top ten predictors of type 2 diabetes through machine learning analysis of UK Biobank data
Source: Springer Nature journal article supplement (doi:10.1038/s41598-024-52023-5), 2024-01-24
Supplement: MOESM1 [file 41598_2024_52023_MOESM1_ESM.pdf]

# Supplemental Material

## **Identifying Top Ten Predictors of Type 2 Diabetes Through Machine Learning Analysis of UK Biobank Data**

Moa Lugner<sup>1\*</sup>, Araz Rawshani<sup>1</sup>, Edvin Helleryd<sup>1</sup>, Björn Eliasson<sup>1,2</sup>

<sup>1</sup> University of Gothenburg, Sahlgrenska academy, Institute of Medicine, Sweden

<sup>2</sup> Sahlgrenska University Hospital, Department of Medicine, Gothenburg, Sweden

Correspondence: Moa.lugner@gu.se

## Table of Contents

|                                                                                   |                  |
|-----------------------------------------------------------------------------------|------------------|
| <b><i>List of variables included in the model.....</i></b>                        | <b><i>4</i></b>  |
| Touchscreen questionnaire or verbal interview .....                               | 4                |
| Medication .....                                                                  | 7                |
| Physical measures.....                                                            | 8                |
| Biochemistry.....                                                                 | 9                |
| Medical conditions .....                                                          | 11               |
| Female-specific factors: .....                                                    | 13               |
| Male-specific factors:.....                                                       | 13               |
| <b><i>Shap summary graph for reduced model.....</i></b>                           | <b><i>15</i></b> |
| Predictors for the reduced model .....                                            | 15               |
| <b><i>Shap summary graph for sex specific models .....</i></b>                    | <b><i>16</i></b> |
| Predictors for sex-specific models .....                                          | 16               |
| <b><i>Top 50 predictors for main model .....</i></b>                              | <b><i>17</i></b> |
| <b><i>Performance metrics for model excluding pre-diabetic subjects .....</i></b> | <b><i>18</i></b> |



## List of variables included in the model

### Touchscreen questionnaire or verbal interview

Age at recruitment  
Length of time at current address  
Number in household  
Number of vehicles in household  
Average total household income before tax  
Distance between home and job workplace  
Time employed in main current job  
Length of working week for main job  
Frequency of travelling from home to job workplace  
Job involves mainly walking or standing  
Job involves heavy manual or physical work  
Qualifications  
Age completed full time education  
Sex  
Type of accommodation lived in  
Own or rent accommodation lived in  
Gas or solid-fuel cooking/heating  
How are people in household related to participant  
Current employment status  
Transport type for commuting to job workplace  
Job involves shift work  
Ethnic background  
Attendance/disability/mobility allowance  
Private healthcare  
IPAQ activity group  
MET minutes per week for moderate activity  
MET minutes per week for vigorous activity  
MET minutes per week for walking  
Summed days activity  
Summed minutes activity  
Length of mobile phone use  
Weekly usage of mobile phone in last 3 months  
Hands-free device/speakerphone use with mobile phone in last 3 month  
Plays computer games  
Sleep duration  
Getting up in morning  
Morning/evening person (chronotype)  
Nap during day  
Sleeplessness / insomnia  
Daytime dozing / sleeping (narcolepsy)  
Past tobacco smoking  
Exposure to tobacco smoke at home  
Exposure to tobacco smoke outside home  
Time spend outdoors in summer

Time spent outdoors in winter  
Skin colour  
Ease of skin tanning  
Childhood sunburn occasions  
Use of sun/uv protection  
Frequency of solarium/sunlamp use  
Age first had sexual intercourse  
Lifetime number of sexual partners  
relative\_diabetes\_score:  
Above moderate/vigorous recommendation  
Above moderate/vigorous/walking recommendation  
Difference in mobile phone use compared to two years previously  
Usual side of head for mobile phone use  
Snoring  
Ever smoked  
Smoking status  
Current tobacco smoking  
Smoking/smokers in household  
Hair colour (natural, before greying)  
Facial ageing  
Ever had same-sex intercourse  
Breastfed as a baby  
Comparative body size at age 10  
Comparative height size at age 10  
Handedness (chirality/laterality)  
Adopted as a child  
Part of a multiple birth  
Maternal smoking around birth  
Alcohol intake frequency  
Average weekly red wine intake  
Average weekly champagne plus white wine intake  
Average weekly beer plus cider intake  
Average weekly spirits intake  
Average weekly fortified wine intake  
Alcohol intake versus 10 years previously  
total\_number\_of\_units\_weekly  
raw\_and\_cooked\_veg  
fresh\_and\_dried\_fruit  
Oily fish intake  
Non-oily fish intake  
Processed meat intake  
Poultry intake  
Beef intake  
Lamb/mutton intake  
Pork intake  
Cheese intake  
Bread intake

Cereal intake  
Salt added to food  
Tea intake  
Hot drink temperature  
Water intake  
Variation in diet  
Alcohol drinker status  
Alcohol usually taken with meals  
Reason for reducing amount of alcohol drunk  
Never eat eggs, dairy, wheat, sugar  
Milk type used  
Spread type  
Non-butter spread type details  
Bread type  
Cereal type  
Coffee type  
Major dietary changes in the last 5 years  
Frequency of friend/family visits  
Able to confide  
Neuroticism score  
Frequency of depressed mood in last 2 weeks  
Frequency of unenthusiasm / disinterest in last 2 weeks  
Frequency of tenseness / restlessness in last 2 weeks  
Frequency of tiredness / lethargy in last 2 weeks  
Leisure/social activities  
Mood swings  
Miserableness  
Irritability  
Sensitivity / hurt feelings  
Fed-up feelings  
Nervous feelings  
Worrier / anxious feelings  
Tense / 'highly strung'  
Worry too long after embarrassment  
Suffer from 'nerves'  
Loneliness, isolation  
Guilty feelings  
Risk taking  
Seen doctor (GP) for nerves, anxiety, tension or depression  
Seen a psychiatrist for nerves, anxiety, tension or depression  
Ever depressed for a whole week  
Ever unenthusiastic/disinterested for a whole week  
Ever manic/hyper for 2 days  
Ever highly irritable/argumentative for 2 days  
Illness, injury, bereavement, stress in last 2 years  
Overall health rating  
Falls in the last year

Long-standing illness, disability or infirmity  
Weight change compared with 1 year ago  
Wheeze or whistling in the chest in last year  
Shortness of breath walking on level ground  
Leg pain on walking  
Pain type(s) experienced in last month  
Chest pain or discomfort

### Medication

N02 - Analgesics  
A01 - Stomatological preparations  
B01 - Antithrombotic agents  
C01 - Cardiac therapy  
G02 - Other gynecologicals  
M01 - Anti-inflammatory and antirheumatic products  
M02 - Topical products for joint and muscular pain  
R02 - Throat preparations  
C10 - Lipid modifying agents  
A02 - Drugs for acid-related disorders  
A11 - Vitamins  
C03 - Diuretics  
C09 - Agents acting on the renin-angiotensin system  
C08 - Calcium channel blockers  
H03 - Thyroid therapy  
C07 - Beta blocking agents  
R03 - Drugs for obstructive airway diseases  
A10 - Drugs used in diabetes  
D11 - Other dermatological preparations  
S01 - Ophthalmologicals  
N06 - Psychoanaleptics  
M05 - Drugs for treatment of bone diseases  
C02 - Antihypertensives  
R06 - Antihistamines for systemic use  
M04 - Antigout preparations  
A12 - Mineral supplements  
G04 - Urologicals  
A07 - Antidiarrheals, intestinal anti-inflammatory/anti-infective agents  
D07 - Corticosteroids, dermatological preparations  
R01 - Nasal preparations  
B03 - Antianemic preparations  
P01 - Antiprotozoals  
C05 - Vasoprotectives  
H02 - Corticosteroids for systemic use  
S02 - Otologicals  
S03 - Ophthalmological and otological preparations  
L01 - Antineoplastic agents  
L04 - Immunosuppressants  
R05 - Cough and cold preparations

A03 - Drugs for functional gastrointestinal disorders  
N03 – Antiepileptics  
G03 - Sex hormones and modulators of the genital system  
N05 - Psycholeptics  
L02 - Endocrine therapy  
A06 - Laxatives  
N07 - Other nervous system drugs  
D06 - Antibiotics and chemotherapeutics for dermatological use  
G01 - Gynecological antiinfectives and antiseptics  
J01 - Systemic antibacterials  
D01 - Antifungals for dermatological use  
D02 - Emollients and protectives  
B02 - Antihemorrhagics  
D05 - Antipsoriatics  
A08 - Antiobesity preparations, excluding diet products  
M03 - Muscle relaxants  
V03 - All other therapeutic products  
J05 - Antivirals for systemic use  
V06 - General nutrients  
D10 - Anti-acne preparations  
N04 - Anti-Parkinson drugs  
A09 - Digestives, including enzymes  
B05 - Blood substitutes and perfusion solutions  
J07 - Vaccines  
A05 - Bile and liver therapy  
D08 - Antiseptics and disinfectants  
H01 - Pituitary and hypothalamic hormones and analogues  
N01 - Anesthetics  
D03 - Preparations for treatment of wounds and ulcers  
M09 - Other drugs for disorders of the musculo-skeletal systemV04  
D04 - Antipruritics, including antihistamines, anesthetics, etc.  
D09 - Medicated dressings  
J02 - Antimycotics for systemic use  
J04 - Drugs for tuberculosis  
C04 - Peripheral vasodilators  
A04 - Antiemetics and antinauseants  
P03 - Ectoparasiticides, including scabicides  
L03 - Immunostimulants  
A16 - Other alimentary tract and metabolism products  
H04 - Pancreatic hormones  
H05 - Calcium homeostasis

#### Physical measures

diastolic\_bp\_mean

systolic\_bp\_mean

pulse\_pressure

mean\_arterial\_pressure

Pulse wave Arterial Stiffness index

Hand strength  
Waist circumference  
Weight  
Body mass index (BMI)  
Hip circumference  
Standing height  
Sitting height  
waist\_hip\_ratio  
Leg fat-free mass (right)  
Leg predicted mass (left)  
Leg predicted mass (right)  
Arm fat percentage (left)  
Arm fat percentage (right)  
Arm fat mass (left)  
Arm fat mass (right)  
Arm fat-free mass (right)  
Arm fat-free mass (left)  
Arm predicted mass (left)  
Arm predicted mass (right)  
Trunk fat percentage  
Trunk fat mass  
Trunk fat-free mass  
Trunk predicted mass  
Body fat percentage  
Whole body fat mass  
Whole body fat-free mass  
Whole body water mass  
Leg fat percentage (left)  
Leg fat percentage (right)  
Leg fat mass (left)  
Leg fat mass (right)  
Leg fat-free mass (left)  
Impedance of whole body  
Impedance of arm (left)  
Impedance of arm (right)  
Impedance of leg (left)  
Impedance of leg (right)  
bone\_density\_mean  
bone\_density\_mean\_tscore  
Forced expiratory volume in 1-second (FEV1), Best measure  
Forced vital capacity (FVC), Best measure  
Egfr

## Biochemistry

Alanine aminotransferase  
Albumin  
Alkaline phosphatase

Apolipoprotein A  
Apolipoprotein B  
Aspartate aminotransferase  
C-reactive protein  
Calcium  
Cholesterol  
Creatinine  
Cystatin C  
Direct bilirubin  
Gamma glutamyltransferase  
Glucose  
Glycated haemoglobin (HbA1c)  
HDL cholesterol  
IGF-1  
LDL direct  
Lipoprotein A  
Phosphate  
SHBG  
Testosterone  
Total bilirubin  
Total protein  
Triglycerides  
Urate  
Urea  
Vitamin D  
Basophill count  
Basophill percentage  
Eosinophill count  
Eosinophill percentage  
Haematocrit percentage  
Haemoglobin concentration  
High light scatter reticulocyte count  
High light scatter reticulocyte percentage  
Immature reticulocyte fraction  
Lymphocyte count  
Lymphocyte percentage  
Mean corpuscular haemoglobin  
Mean corpuscular haemoglobin concentration  
Mean corpuscular volume  
Mean platelet (thrombocyte) volume  
Mean reticulocyte volume  
Mean spheroid cell volume  
Monocyte count  
Monocyte percentage  
Neutrophill count  
Neutrophill percentage  
Nucleated red blood cell count

Nucleated red blood cell percentage  
Platelet count  
Platelet crit  
Platelet distribution width  
Red blood cell (erythrocyte) count  
Red blood cell (erythrocyte) distribution width  
Reticulocyte count  
Reticulocyte percentage  
White blood cell (leukocyte) count  
Creatinine (enzymatic) in urine  
Potassium in urine  
Sodium in urine

### Medical conditions

AB\_Diagnosis  
C\_Diagnosis  
D\_to\_4Diagnosis  
D\_5\_to\_8Diagnosis  
EDiagnosis  
E\_2\_3Diagnosis  
E\_4\_5Diagnosis  
E\_6Diagnosis  
E\_7Diagnosis  
G\_Diagnosis  
H\_Diagnosis  
I0\_Diagnosis  
I1\_Diagnosis  
I20\_to\_25\_Diagnosis  
I26\_to\_28\_Diagnosis  
I30\_I31\_I32\_I40\_I41\_Diagnosis  
I33\_to\_I39\_Diagnosis  
I42\_I43\_Diagnosis  
I48\_Diagnosis  
I50\_Diagnosis  
I44\_I45\_I46\_I47\_I49\_I51\_I52\_Diagnosis  
I6\_Diagnosis  
I7\_Diagnosis  
I8\_Diagnosis  
I9\_Diagnosis  
J0\_Diagnosis  
J1\_Diagnosis  
J2\_Diagnosis  
J3\_Diagnosis  
J4\_Diagnosis  
J8\_Diagnosis  
J9\_Diagnosis  
K0\_1\_Diagnosis

K2\_K30\_K31\_Diagnosis  
K35\_K36\_K37\_38\_Diagnosis  
K4\_Diagnosis  
K50\_K51\_K52  
K55\_to\_K64  
K65\_K66\_K67  
K7\_Diagnosis  
K8\_Diagnosis  
K9\_Diagnosis  
L\_Diagnosis  
M1\_M2\_Diagnosis  
M3\_Diagnosis  
M4\_M5\_Diagnosis  
M6\_M7\_Diagnosis  
M8\_M9\_Diagnosis  
N0\_Diagnosis  
N10\_to\_N16\_Diagnosis  
N17\_N18\_N19\_Diagnosis  
N20\_to\_N23\_Diagnosis  
N25\_to\_N29\_Diagnosis  
N3\_Diagnosis  
N4\_N5\_Diagnosis  
N6\_Diagnosis  
N7\_Diagnosis  
N8\_Diagnosis  
N9\_Diagnosis  
O0\_Diagnosis  
O1\_Diagnosis  
O2\_Diagnosis  
O3\_O4\_Diagnosis  
O6\_O7\_Diagnosis  
O80\_to\_O84\_Diagnosis  
O85\_to\_O92\_Diagnosis  
O94\_to\_O99\_Diagnosis  
Q\_Diagnosis  
R0\_Diagnosis  
R1\_Diagnosis  
R20\_to\_R23\_Diagnosis  
R25\_to\_R29\_Diagnosis  
R3\_Diagnosis  
R40\_to\_R46\_Diagnosis  
R47\_to\_R49\_Diagnosis  
R5\_R6\_Diagnosis  
R7\_Diagnosis  
R80\_to\_R82\_Diagnosis  
R83\_to\_R89\_Diagnosis  
R90\_to\_R94\_Diagnosis

S\_Diagnosis  
xx\_Diagnosis

#### Female-specific factors:

Ever had breast cancer screening / mammogram  
Years since last breast cancer screening / mammogram  
Ever had cervical smear test  
Years since last cervical smear test  
Age when periods started (menarche)  
Had menopause  
Age at menopause (last menstrual period)  
Time since last menstrual period  
Length of menstrual cycle  
Menstruating today  
Number of live births  
Birth weight of first child  
Age of primiparous women at birth of child  
Age at first live birth  
Age at last live birth  
Ever had stillbirth, spontaneous miscarriage or termination  
Number of stillbirths  
Number of spontaneous miscarriages  
Number of pregnancy terminations  
Ever taken oral contraceptive pill  
Type of progestan-only oral contraceptive used (pilot)  
Age started oral contraceptive pill  
Age when last used oral contraceptive pill  
Ever used hormone-replacement therapy (HRT)  
Age started hormone-replacement therapy (HRT)  
Age last used hormone-replacement therapy (HRT)  
Ever had hysterectomy (womb removed)  
Age at hysterectomy  
Bilateral oophorectomy (both ovaries removed)  
Age at bilateral oophorectomy (both ovaries removed)

#### Male-specific factors:

Relative age of first facial hair  
Relative age voice broke  
Hair/balding pattern  
Number of children fathered

#### Variables Created for Analyses:

##### **relative\_diabetes\_score:**

This score quantifies the presence of diabetes in first-degree relatives of the individual. The score is derived from three fields: "illness of father", "illness of mother", and "illness of sibling". A score of 0 indicates that none of the first-degree relatives (father, mother, or

sibling) have diabetes. A score of 1 indicates that one of the first-degree relatives has diabetes. A score of 2 denotes that two or more first-degree relatives have diabetes.

**total\_number\_of\_units\_weekly:**

This variable represents the estimated weekly consumption of alcohol units by participants. The derivation process is as follows:

In the UK Biobank study, participants provided their estimated consumption by specifying the number of glasses of different alcoholic beverages they drink per month.

Each type of drink was converted into units of alcohol based on its alcohol content. For reference, one unit corresponds to 10ml or 8g of pure alcohol.

To transform the monthly consumption estimation into a weekly format, the total monthly units for each participant were divided by 4.345.

This calculation provides an approximate weekly consumption of alcohol units for each individual.

**pulse\_pressure:**

This variable is derived from the difference between systolic and diastolic blood pressure measurements. The formula used is:

pulse pressure = systolic blood pressure (mean) – diastolic blood pressure (mean)

**mean\_arterial\_pressure:**

This variable is an estimate of the average arterial pressure during a single cardiac cycle. It is calculated using the formula:  $MAP = \text{diastolic blood pressure (mean)} + 1/3(\text{pulse\_pressure})$

**Egfr**

Egfr was calculated using the function CKDEpi.creat in the “nephro-package in R. It utilizes creatinine, sex, age and ethnicity to calculate egfr using the established CKD-EPI equation.

## Shap summary graph for reduced model

Predictors for the reduced model

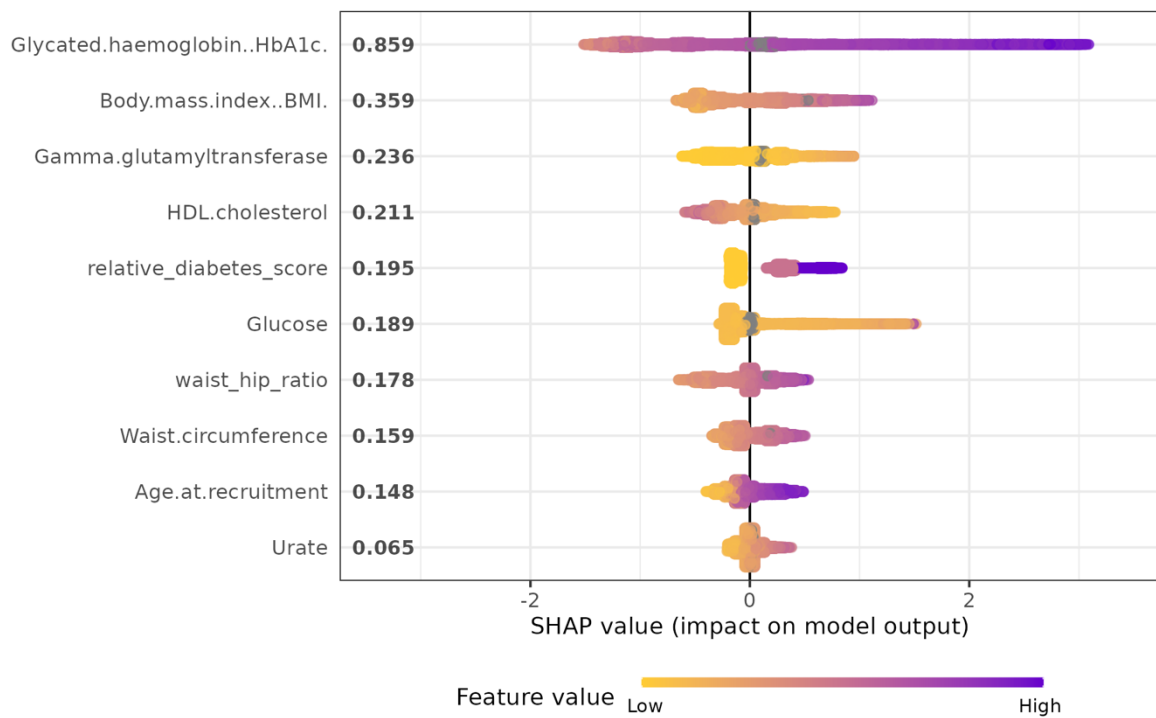

Shap summary for the reduced model

## Shap summary graph for sex specific models

### Predictors for sex-specific models

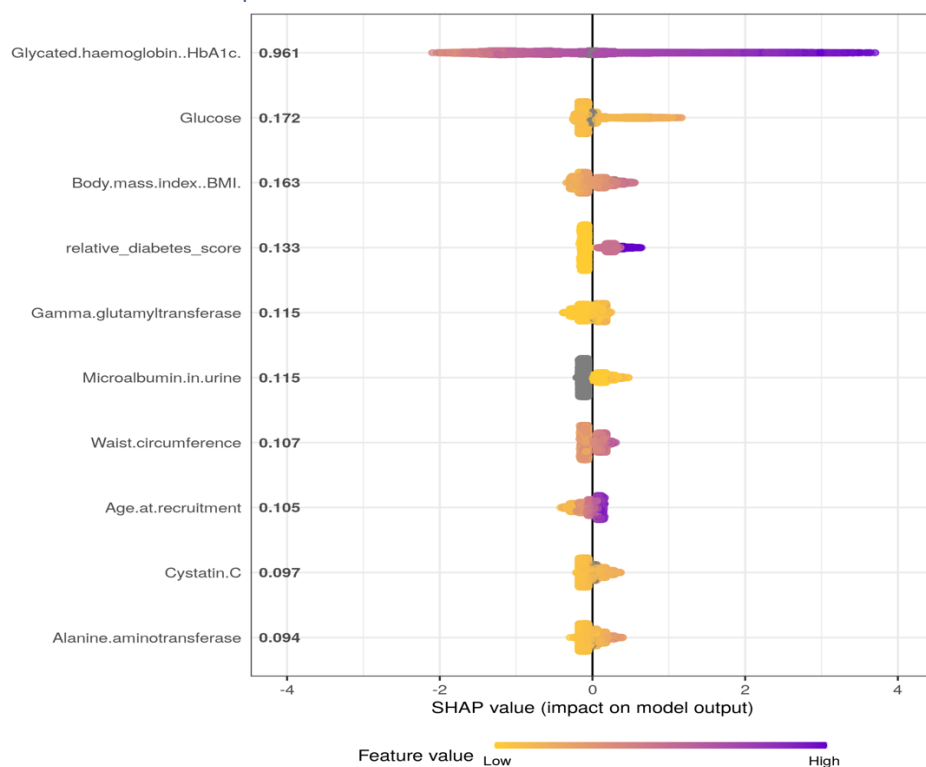

### Shap summary graph for male cohort

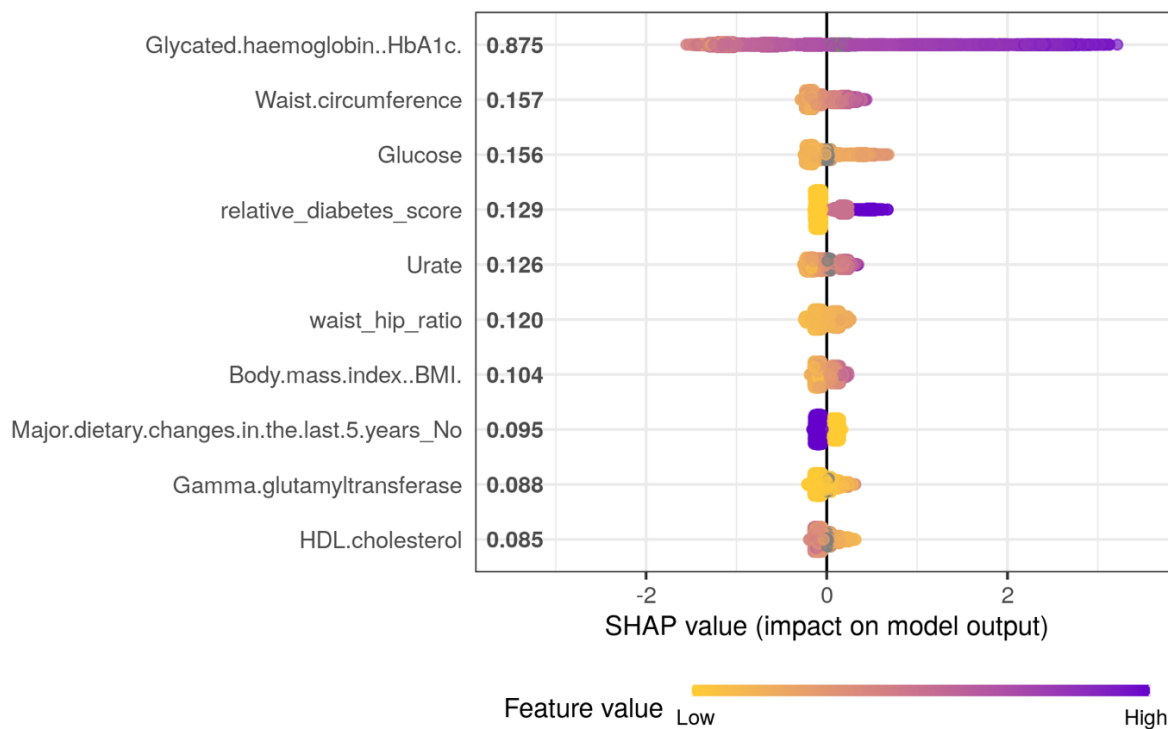

### Shap summary graph for female cohort

## Top 50 predictors for main model

| Top 50 Features Based on SHAP Values                          |                 |
|---------------------------------------------------------------|-----------------|
| Feature                                                       | Mean SHAP Value |
| Hba1C                                                         | 0.95            |
| BMI                                                           | 0.19            |
| Waist circumference                                           | 0.19            |
| Glucose                                                       | 0.16            |
| relative_diabetes_score                                       | 0.16            |
| Gamma-glutamyltransferase                                     | 0.12            |
| Waist-hip ratio                                               | 0.12            |
| HDL cholesterol                                               | 0.09            |
| Age at recruitment                                            | 0.08            |
| Urate                                                         | 0.08            |
| Alanine aminotransferase                                      | 0.07            |
| Weight change compared with 1 year ago lost weight            | 0.07            |
| Vitamin D                                                     | 0.07            |
| Aspartate aminotransferase                                    | 0.07            |
| Reticulocyte count                                            | 0.07            |
| Haemoglobin concentration                                     | 0.06            |
| Sodium in urine                                               | 0.06            |
| Longstanding illness, disability or infirmity No              | 0.06            |
| Cystatin C                                                    | 0.05            |
| Weekly alcohol intake                                         | 0.05            |
| Triglycerides                                                 | 0.05            |
| A02 Drugs for acid-related disorders                          | 0.05            |
| SHBG                                                          | 0.05            |
| Longstanding illness, disability or infirmity Yes             | 0.05            |
| N02 Analgesics                                                | 0.05            |
| Pulse pressure                                                | 0.04            |
| Major dietary changes. In the last 5 years No                 | 0.04            |
| Creatinine                                                    | 0.04            |
| Mean sphered cell volume                                      | 0.04            |
| Reticulocyte percentage                                       | 0.04            |
| Grip strength                                                 | 0.04            |
| Platelet distribution width                                   | 0.04            |
| Platelet crit                                                 | 0.04            |
| Attendance, disability, mobility, allowance None.of.the.above | 0.04            |
| Comparative body size at age 10 Thinner                       | 0.04            |
| Systolic blood pressure                                       | 0.04            |
| Red blood cell erythrocyte distribution width                 | 0.03            |
| Urea                                                          | 0.03            |
| Mean corpuscular haemoglobin                                  | 0.03            |
| Potassium in urine                                            | 0.03            |
| Overall health rating Fair                                    | 0.03            |
| Direct bilirubin                                              | 0.03            |
| Average weekly spirits intake                                 | 0.03            |
| Cholesterol                                                   | 0.03            |
| Lymphocyte count                                              | 0.03            |
| IGF.1                                                         | 0.03            |
| C09 Agents acting on the renin-angiotensin system             | 0.03            |

|                                                             |      |
|-------------------------------------------------------------|------|
| Forced expiratory volume in 1 second<br>FEV1...Best.measure | 0.03 |
| Daytime dozing, sleeping,<br>narcolepsy. Never.rarely       | 0.03 |
| K55_to_K64                                                  | 0.03 |

## Performance metrics for model excluding pre-diabetic subjects

|           |        |           |
|-----------|--------|-----------|
| accuracy  | binary | 0.9233028 |
| precision | binary | 0.1736723 |
| recall    | binary | 0.6081551 |
| f_meas    | binary | 0.2701867 |
| roc_auc   | binary | 0.8902863 |

*Table with performance metrics of additional model where all participants with 6.1 or higher p-glucose at baseline were excluded.*
